# Supplementary material for: Late Holocene (0–6 ka) sea-level changes in the Makassar Strait, Indonesia
Source: Copernicus journal article supplement (doi:10.5194/cp-16-1187-2020), 2020-07-10
Supplement: Supplementary file 2 [file cp-16-1187-2020-supplement.zip]

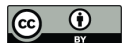

## *Supplement of*

# **Late Holocene (0–6 ka) sea-level changes in the Makassar Strait, Indonesia**

**Maren Bender et al.**

*Correspondence to:* Maren Bender ([mbender@marum.de](mailto:mbender@marum.de))

- [cp-16-1187-2020-supplement-title-page.pdf](#)
- [SM1\\_final.xlsx](#)
- [SM3-1.pdf](#)

The copyright of individual parts of the supplement might differ from the CC BY 4.0 License.
